# Supplementary material for: Combining Hypermethylated RASSF1A Detection Using ddPCR with miR-371a-3p Testing: An Improved Panel of Liquid Biopsy Biomarkers for Testicular Germ Cell Tumor Patients
Source: MDPI journal article supplement (doi:10.3390/cancers13205228), 2021-10-18
Supplement: s1 [file s1]

## Article

# Combining Hypermethylated *RASSF1A* Detection Using ddPCR with miR-371a-3p Testing: An Improved Panel of Liquid Biopsy Biomarkers for Testicular Germ Cell Tumor Patients

João Lobo, Lieke M.J. van Zogchel, Mohammed G. Nuru, Ad J.M. Gillis, C. Ellen van der Schoot, Godelieve A.M. Tytgat and Leendert H.J. Looijenga

## Supplementary Methods

**Table S1.** Performance on discriminating TGCTs from controls using the miR-371a-3p and *RASSF1A<sub>M</sub>* as serum biomarkers.

| Serum biomarker                          | Context              | Sensitivity (%) | Specificity (%) | PPV (%) | NPV (%) |
|------------------------------------------|----------------------|-----------------|-----------------|---------|---------|
| miR-371a-3p                              | All TGCTs            | 85.7            | 100             | 100     | 60      |
|                                          | All TGCTs (excl. TE) | 89.9            | 100             | 100     | 70      |
| <i>RASSF1A<sub>M</sub></i>               | All TGCTs            | 86.7            | 100             | 100     | 69.1    |
| miR-371a-3p + <i>RASSF1A<sub>M</sub></i> | All TGCTs            | 100             | 100             | 100     | 100     |

**Abbreviations:** PPV – positive predictive value; NPV – negative predictive value; *RASSF1A<sub>M</sub>* – hypermethylated *RASSF1A*; TE – teratoma; TGCT – testicular germ cell tumor.

**Table S2.** Primers and probe sequences.

| Target         | Forward primer       | Reverse primer       | Probe                                              | Amplicon length (bp) |
|----------------|----------------------|----------------------|----------------------------------------------------|----------------------|
| <i>RASSF1A</i> | AGCCTGAGCTCATTGAGCTG | ACCAGCTGCCGTGTGG     | 5FAM/CCAACGCGCTGCGCAT/3MGBEc                       | 129                  |
| <i>ACTB-1</i>  | GTAAGGACAAGTTGGCCCCC | TGACTTTGTGGTGTGGCTGG | 5HEX/TGCAGGGTT<br>/ZEN/CACCCTCTGCTGCCCCCA /3IABkFQ | 101                  |
| <i>ACTB-2</i>  | GCGCCGTTCCGAAAGTT    | CGGCGGATCGGCAAA      | 5HEX/ACCGCCGAGACCGCGTC/3MGBEc/                     | 137                  |
